# Supplementary material
Source: PubMed Central journal article supplement (PMC6949750)
Supplement: ijcep0012-3819-f7.pdf [file ijcep0012-3819-f7.pdf]

## Correlation of miR-21 to liver fibrosis

**Table S1.** Primer sequences of microRNAs

| microRNAs        |                                                                                                                 |
|------------------|-----------------------------------------------------------------------------------------------------------------|
| miR-21           | UGUCGGGUAGCUUAUCAGACUGAUGUUGACUGUUGAAUCUCAUGGCAACACCAGUCGAUGGGCUGUCUGACA                                        |
| Forward primer:  | 5'-GATCTTAACAGGCCAGAAATGC-3'                                                                                    |
| Reverse primer:  | 5'-CCAGACAGAAGGACCAGAG-3'                                                                                       |
| miR-29           | AUGACUGAUUUUUUGUGUUCAGAGUCAAUUAAUUUUUCUAGCACCAUCUGAAAUCGGUUUAU                                                  |
| Forward primer:  | 5'-CCAACCCTCACGACCTTCT-3'                                                                                       |
| Reverse primer:  | 5'-CATTCTCTCAGCAGTCAG-3'                                                                                        |
| miR-122          | CCUUAGCAGAGCUGUGGAGUGUGACA AUGGUGUUUGUGUCAAAACUAUCAAACGCCAUUAUCACACUAAAUAGCUACUGCUAGGC                          |
| Forward primer:  | 5'-CTTCGTGGCTACAGAGTTTC-3'                                                                                      |
| Reverse primer:  | 5'-CCAGACTTTATTCAGTAAGTACA-3'                                                                                   |
| miR-138-2        | CGUUGCUGCAGCUGGUGUUGUAUCAGGCCGACGAGCAGCGCAUCCUUAACCCGGCUAUUUCACGACACCAGGGUUGCAUCA                               |
| Forward primer:  | 5'-GGCGGAGTTCTGGTATCGT-3'                                                                                       |
| Reverse primer:  | 5'-GCTGCCAGGTGATTCTGAG-3'                                                                                       |
| miR-140          | UGUGUCUCUCUCUGUGUCCUGCCAGUGUUUUACCCUAUGGUAGGUUACGUCUAGCUGUUCUACCACAGGGUAGAACCACGGACAGGAUACCGGGGCACC             |
| Forward primer:  | 5'-CCGTGGATGGATGTTCTTT-3'                                                                                       |
| Reverse primer:  | 5'-ATTCAGAGTCCTTTTGGGCTT-3'                                                                                     |
| miR-143          | GCGCAGCGCCUGUCUCCAGCCUGAGGUGCAGUGCUGCAUCUCUGGUCAGUUGGGAGUCUGAGAUGAAGCACUGUAGCUCAGGAAGAGAGAAGUUGUUCUGCAGC        |
| Forward primer:  | 5'-GGAAACACAGTTGTGAGGAAT-3'                                                                                     |
| Reverse primer:  | 5'-CTTACCACCTCCAGGCTGAT-3'                                                                                      |
| miR-221          | UGAACAUCCAGGUCUGGGGCAUGAACCCUGGCAUACA AUGUAGAUUUCUGUGUUCGUUAGGCAACAGCUACAUUGUCUGCUGGGUUUCAGGCUACCGGAAACAUUUUCUC |
| Forward primer:  | 5'-CTGAGGTGATCAGCTTTCTT-3'                                                                                      |
| Reverse primer:  | 5'-GTAGGCAGTTGTGTTGAAATAGT-3'                                                                                   |
| miR-222          | GCUGCUGGAAGGUGUAGGUACCCUCA AUGGCUAGUAGCCAGUGUAGAUCCUGUCUUCUGUAAUCAGCAGCUACAUCUGGCUACUGGGUCUCUGAUGGCAUCUUCUAGCU  |
| Forward primer:  | 5'-GTGTGTGTGTGTAATCAAG-3'                                                                                       |
| Reverse primer:  | 5'-CAGTCAGTATCTGTTGGATAAGT-3'                                                                                   |
| Cel-miR-39 (kit) | UAUACCGAGAGCCAGCUGAUUUCGUCUUGGUAAUAAGCUCGUCAUUGAGAUUAUACCCGGUGUAAAUCAGCUUGGCUCUGGUGUC                           |

Primer sequences are 5'-3'.
